# Supplementary material for: Multi-protein spatial signatures in ductal carcinoma in situ (DCIS) of breast
Source: PubMed Central journal article supplement (PMC7961015; doi:10.1038/s41416-020-01216-6), 2021-01-07
Supplement: 41416_2020_1216_MOESM1_ESM.pdf [file 41416_2020_1216_MOESM1_ESM.pdf]

## **SUPPLEMENTAL INFORMATION**

Supplemental Information includes four figures and tables.

### **Supplementary Data**

**Supplementary Figure 1:** Representative figures showing the expression of individual markers in example DCIS cases.

**Supplementary Figure 2:** Kaplan Meier plots of entire patient group (n=135) and study cohort included in the MxIF and outcome analysis (n=51).

**Supplementary Figure 3:** Correlation plots for all cell biomarker data in tumor and stroma.

**Supplementary Figure 4:** Violin plots showing the association between marker expression and BCE.

**Supplementary Table 1.** Clinical Demographic Summary

**Supplementary Table 2:** Antibodies, Clone, and Conjugate Information

**Supplementary Table 3:** Details of the antibodies and the round of staining used for each marker during the MxIF staining.

**Supplementary Table 4:** Detailed stepwise flow chart of the analysis and the filters used in the study.

Supplementary Figure 1

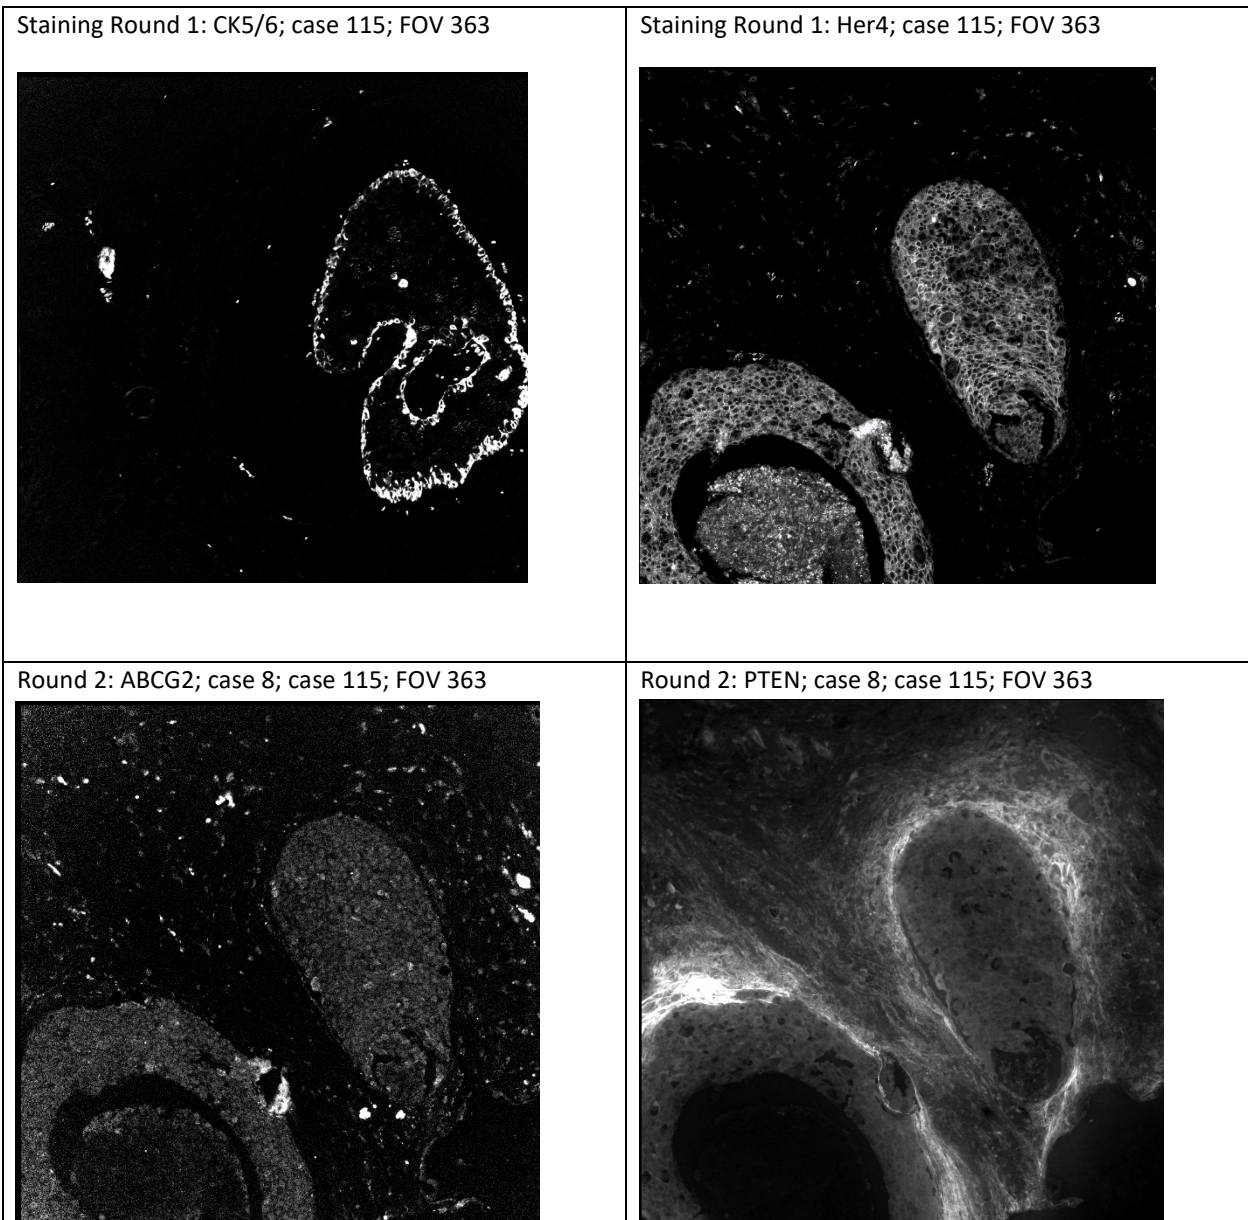

Supplementary Figure 1

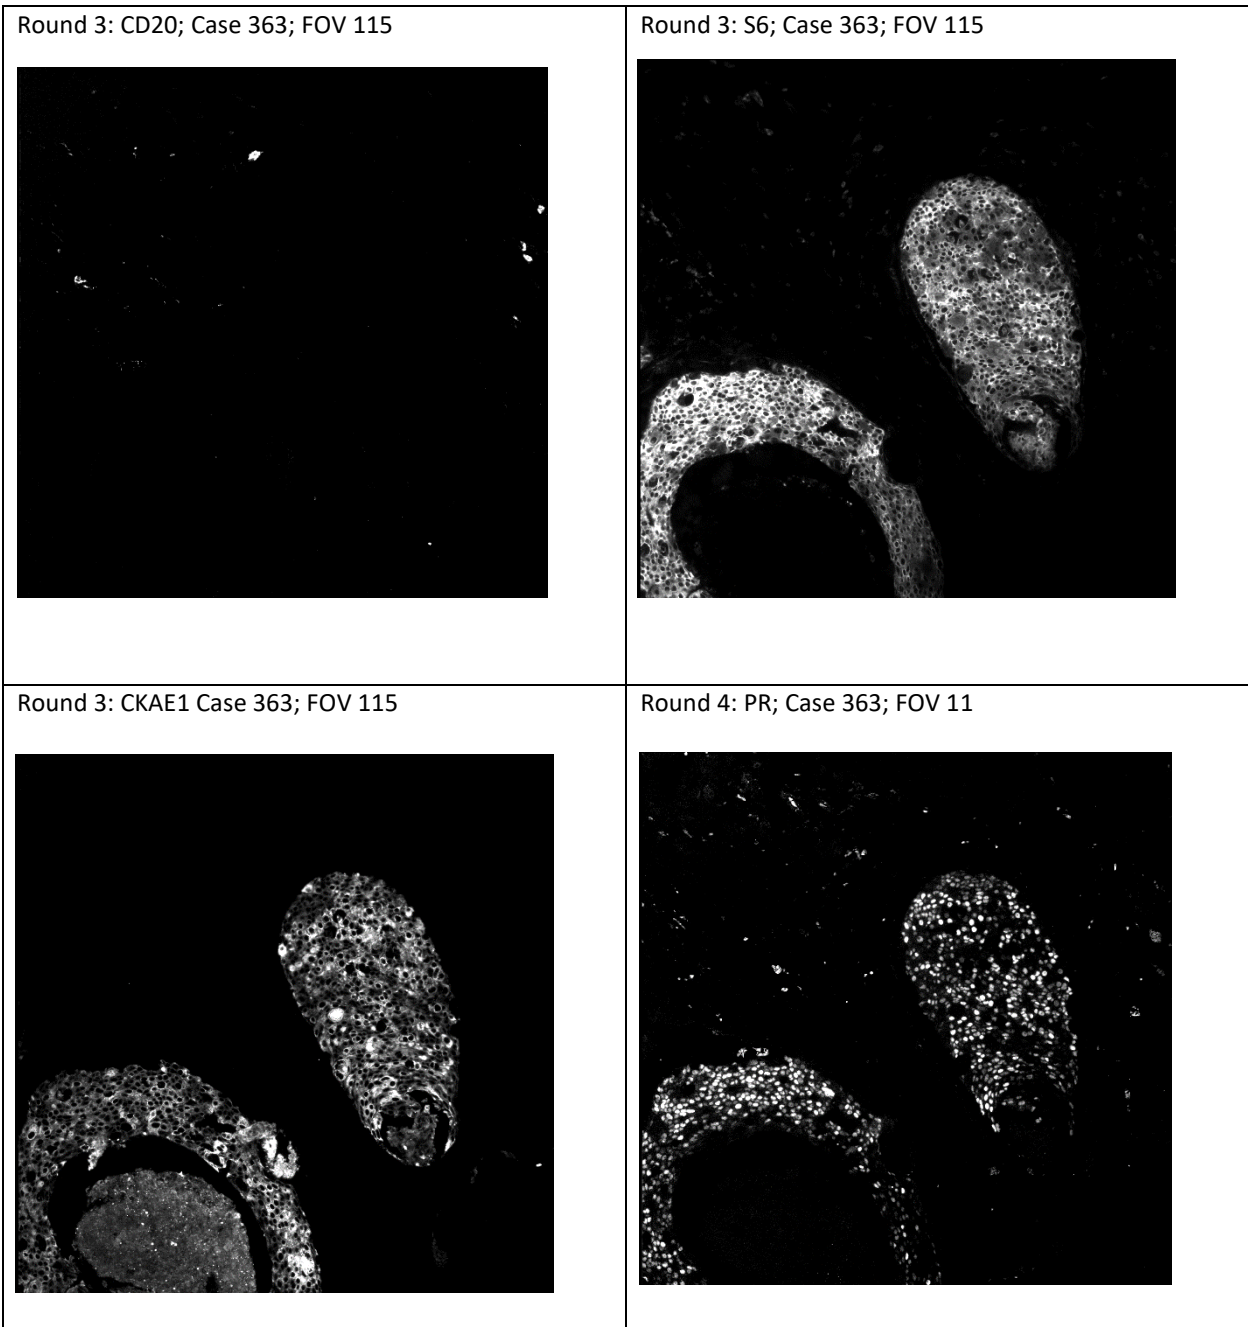

Supplementary Figure 1

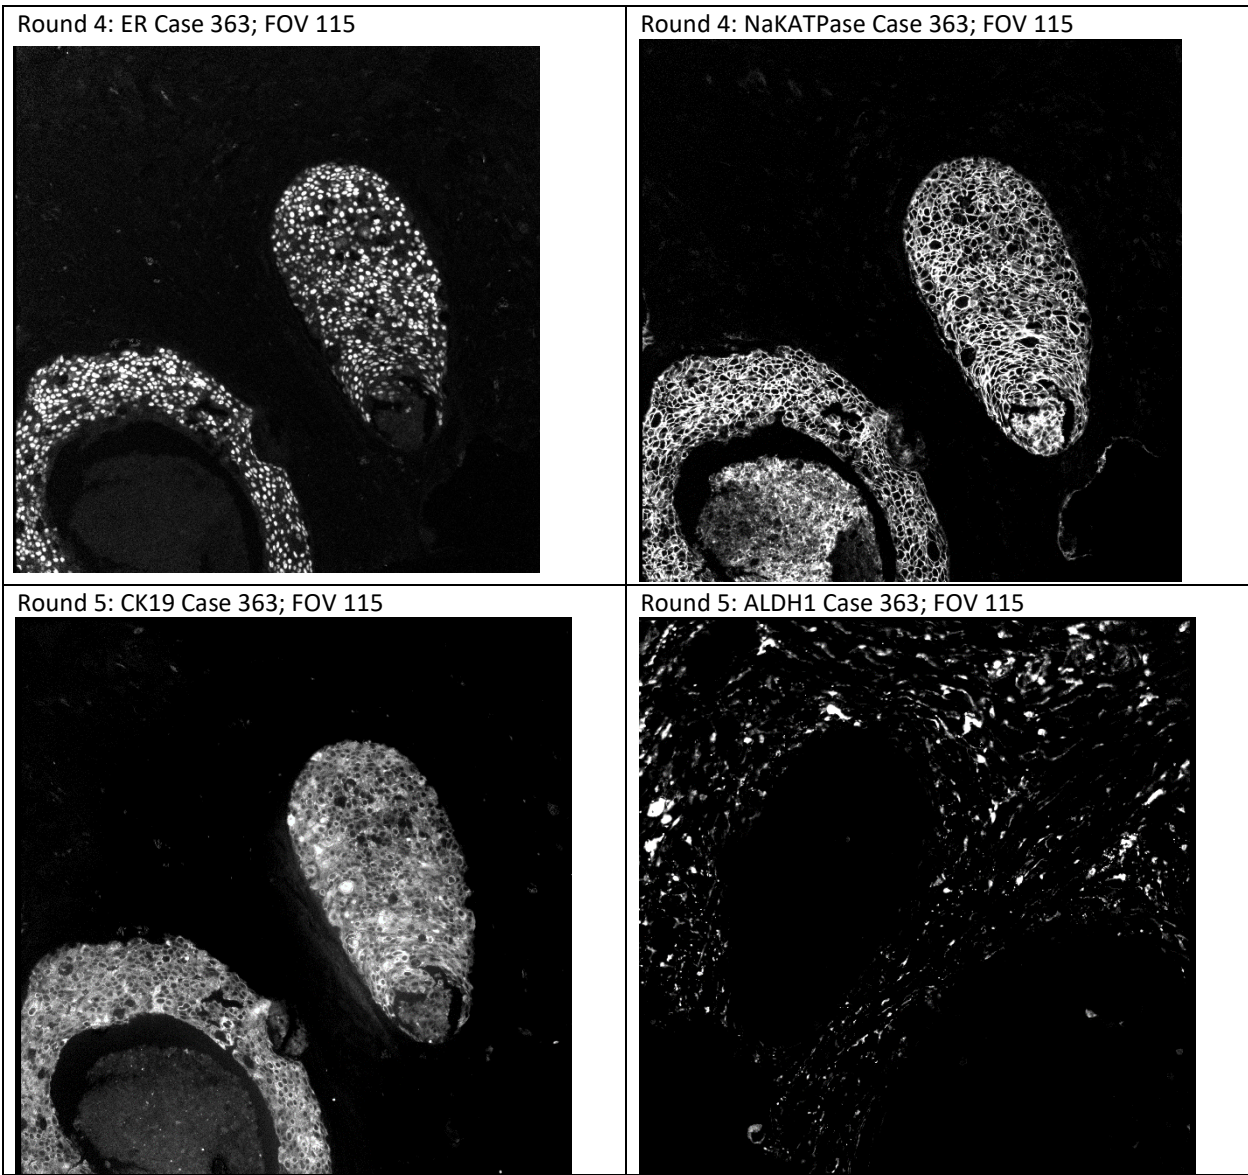



Supplementary Figure 1

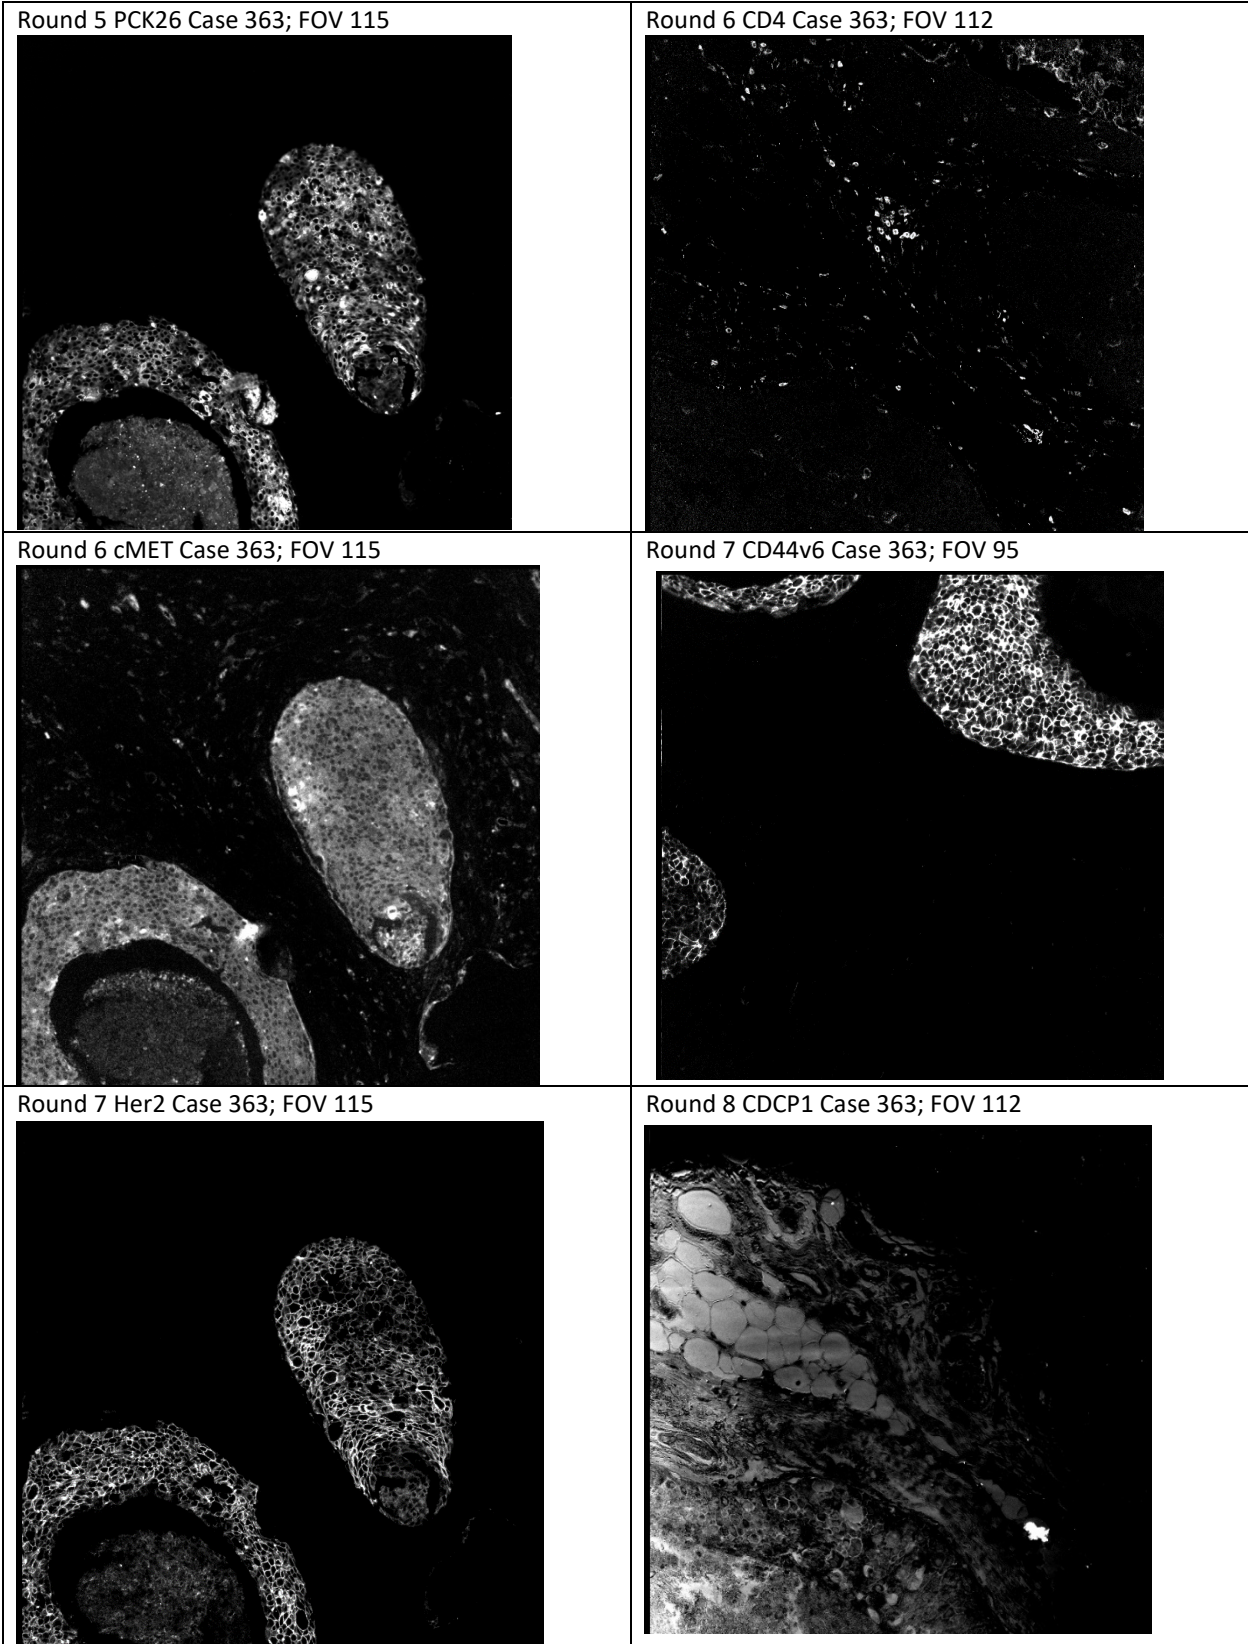

Supplementary Figure 1

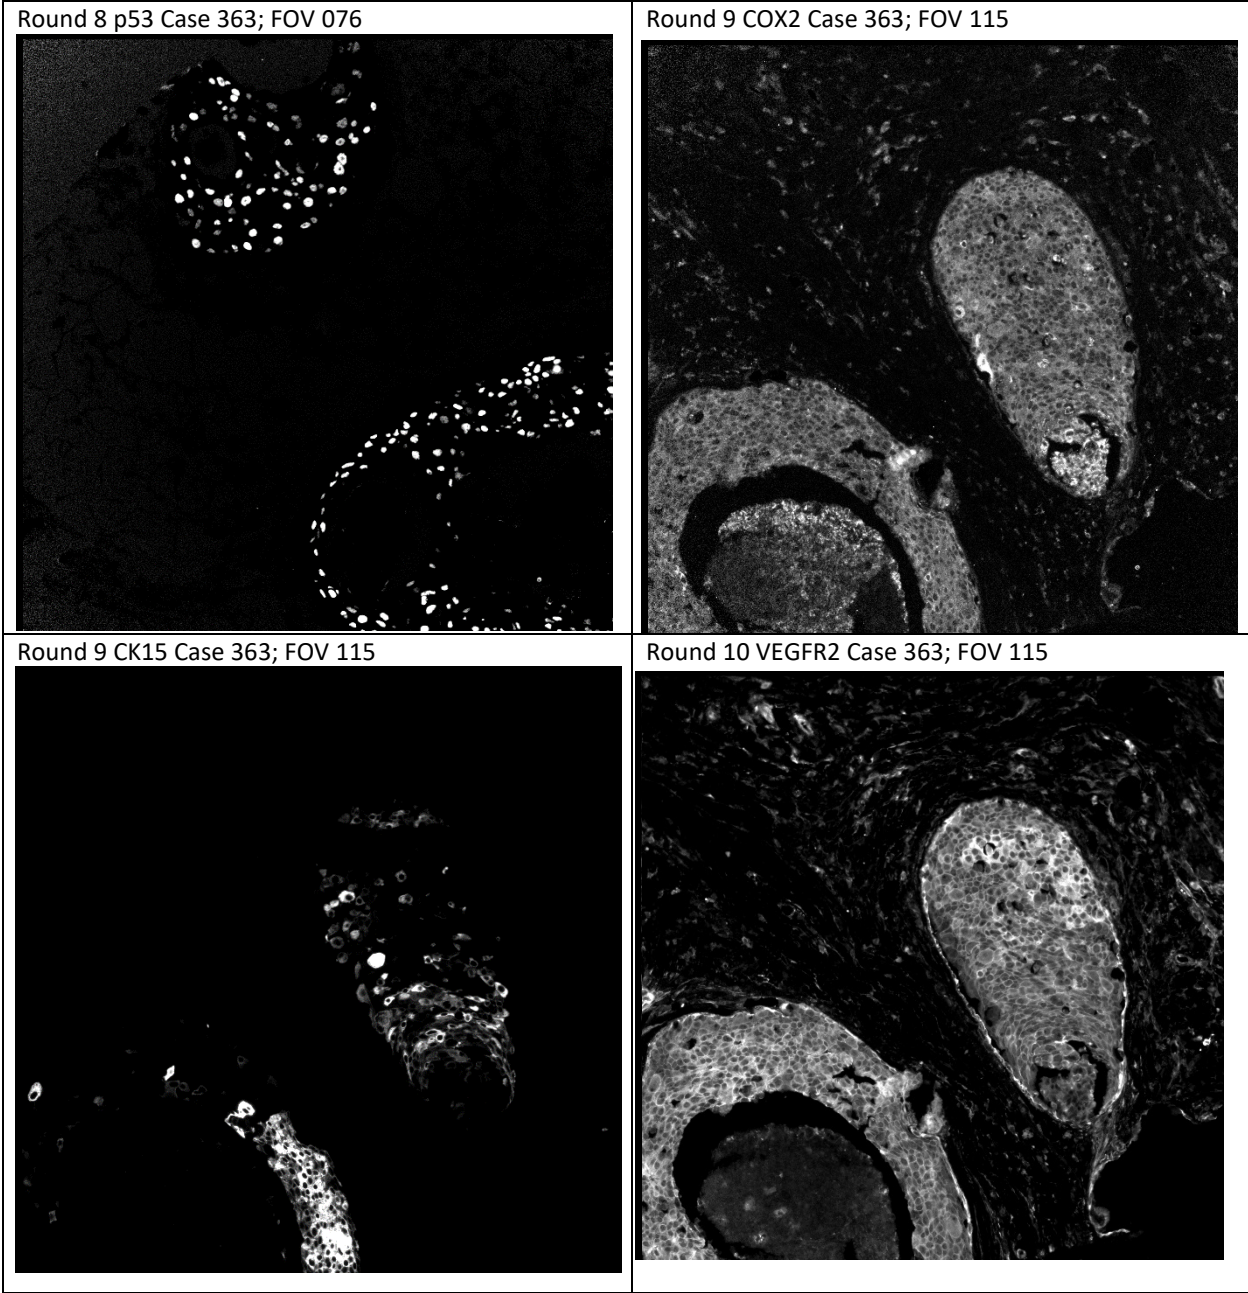



Supplementary Figure 1

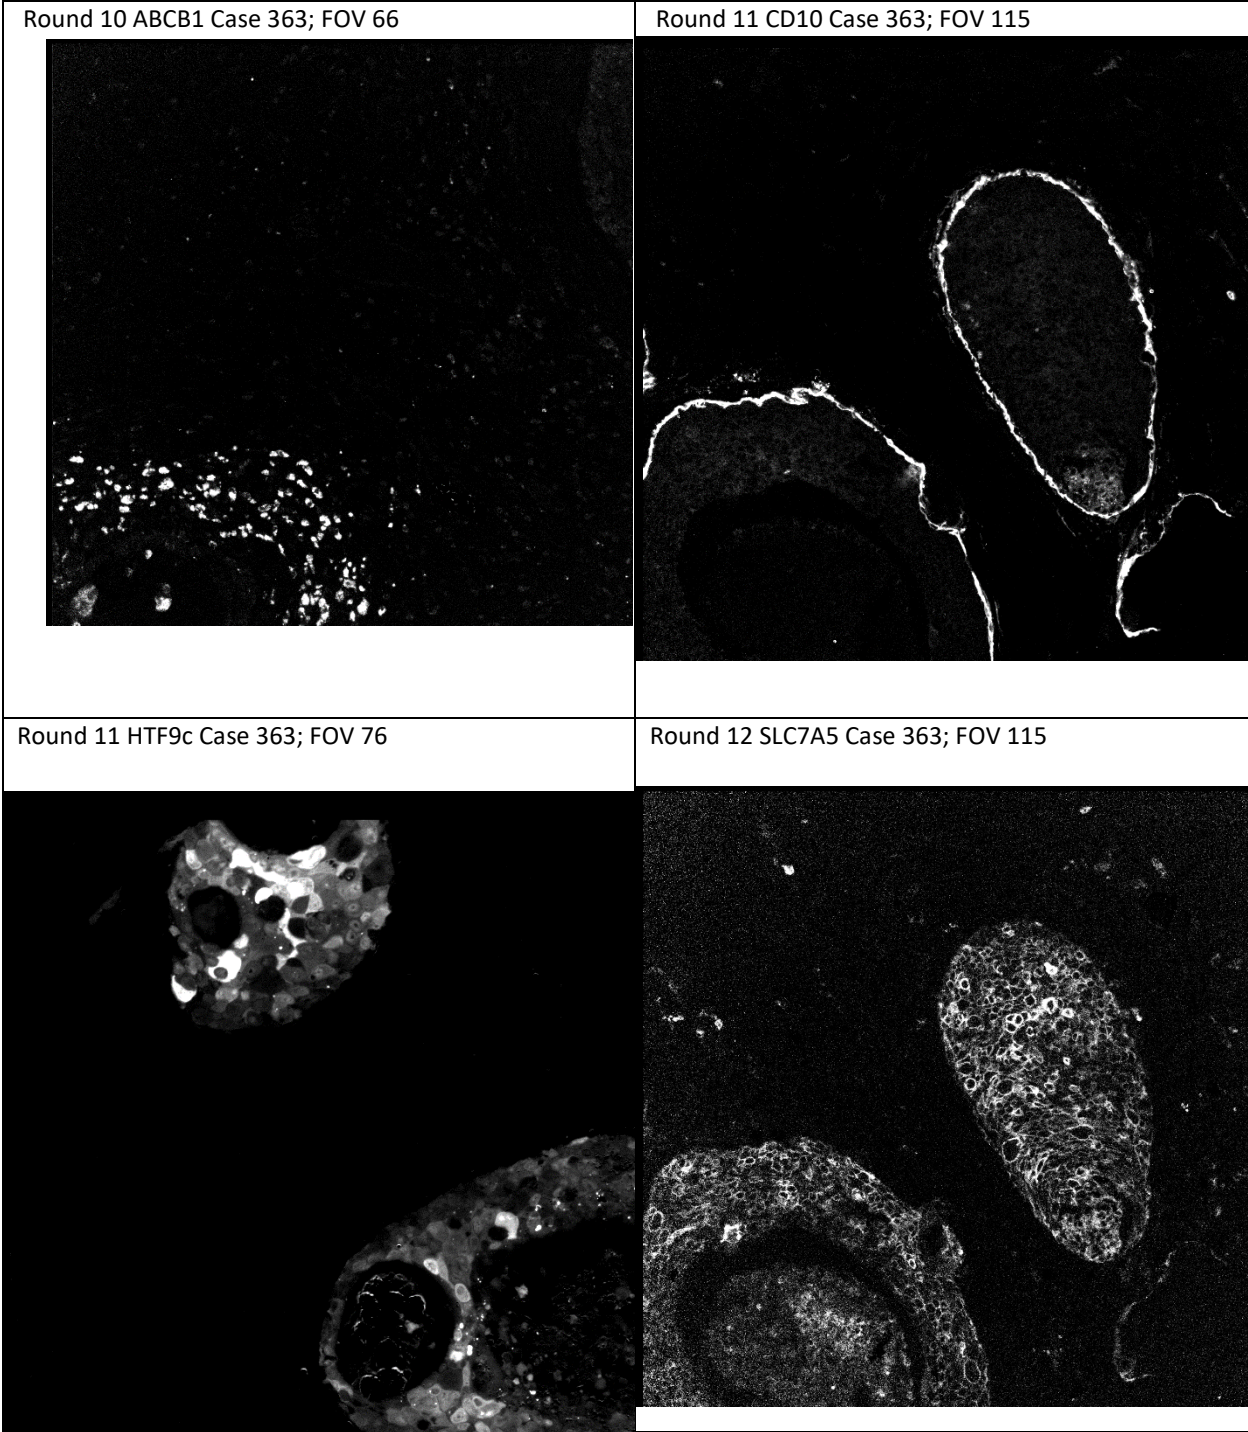

Supplementary Figure 1

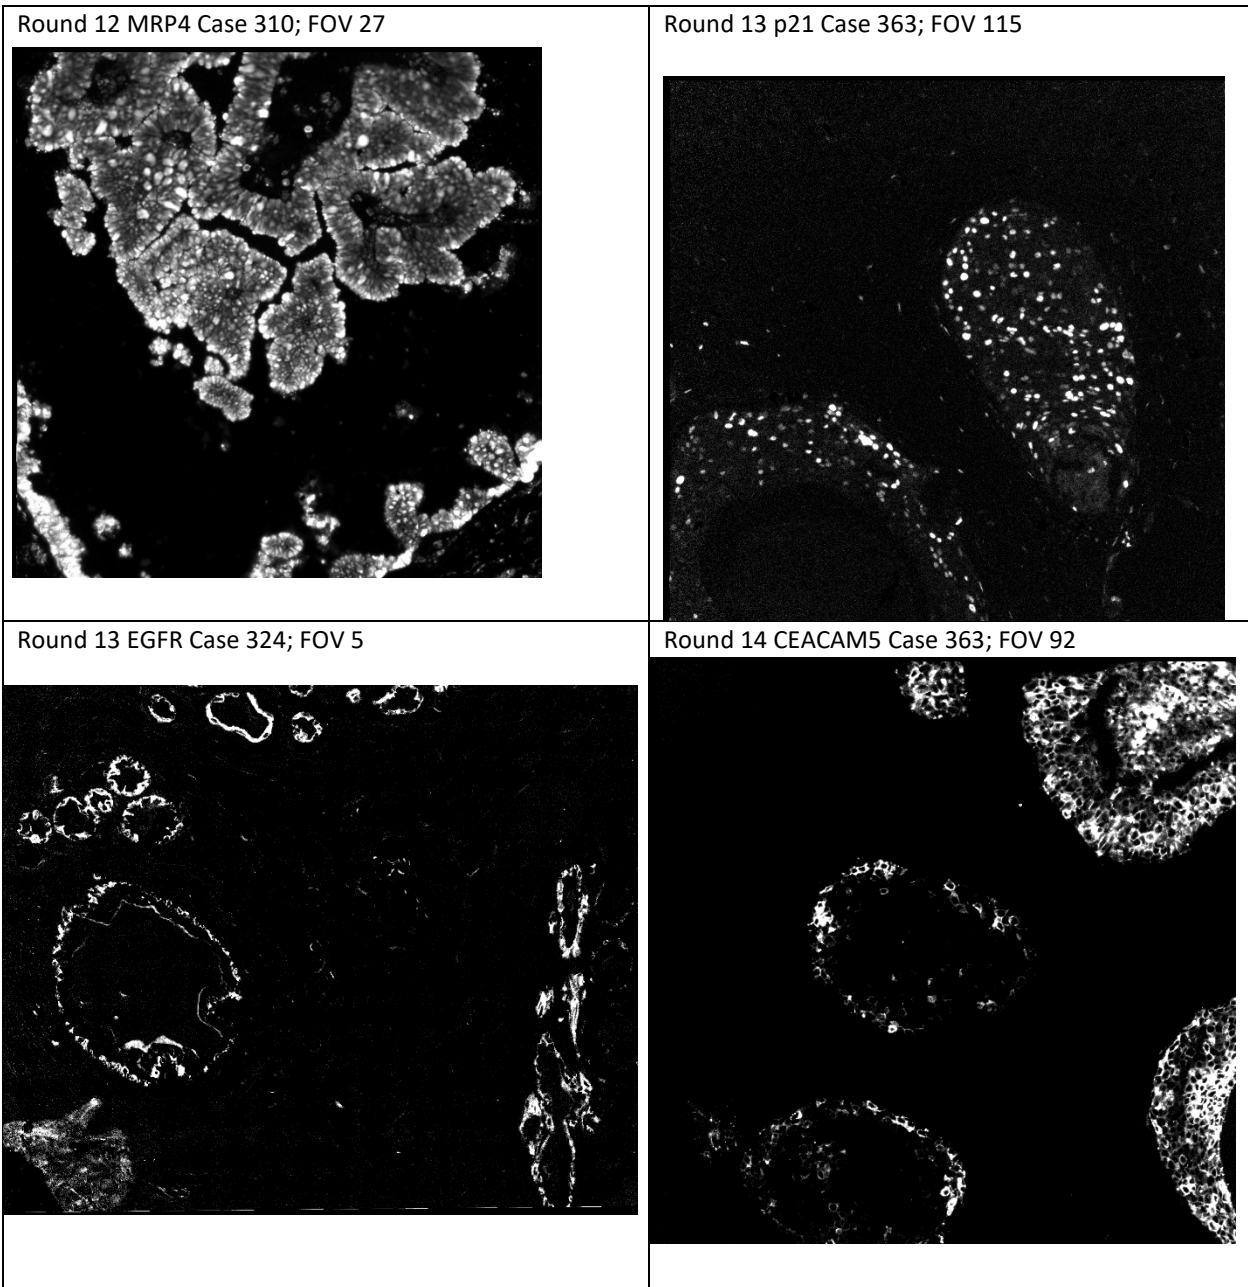



Supplementary Figure 1

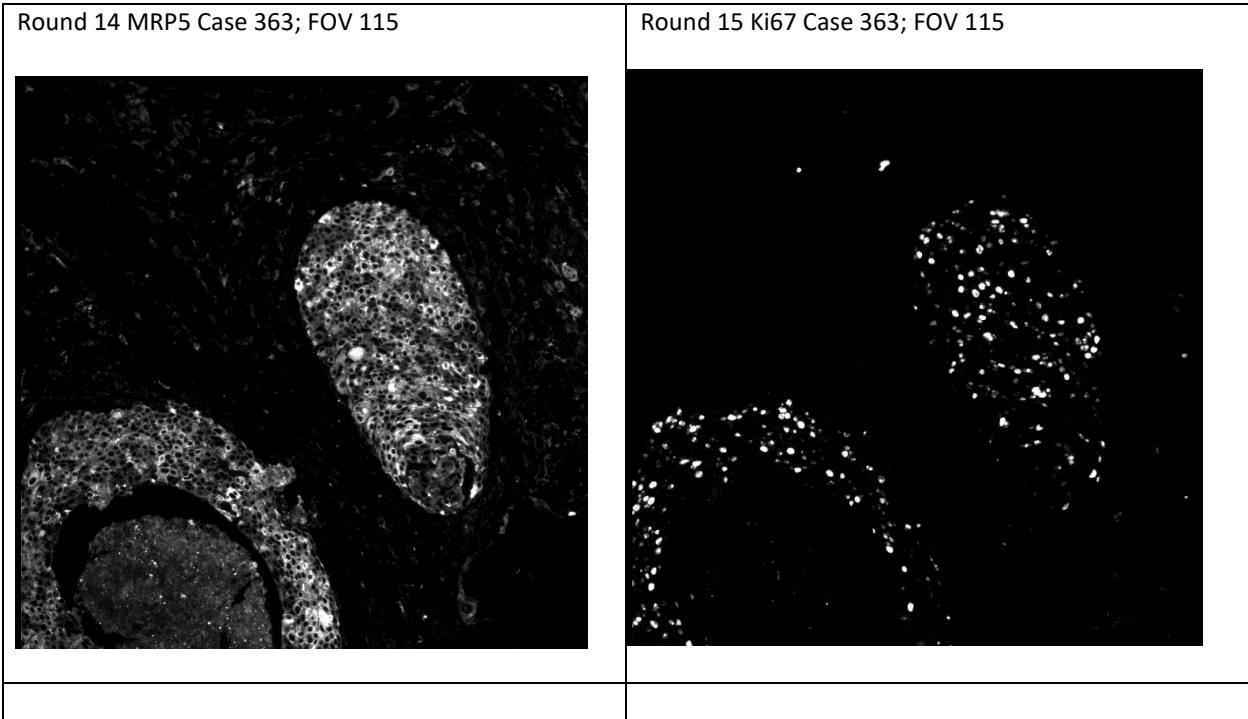

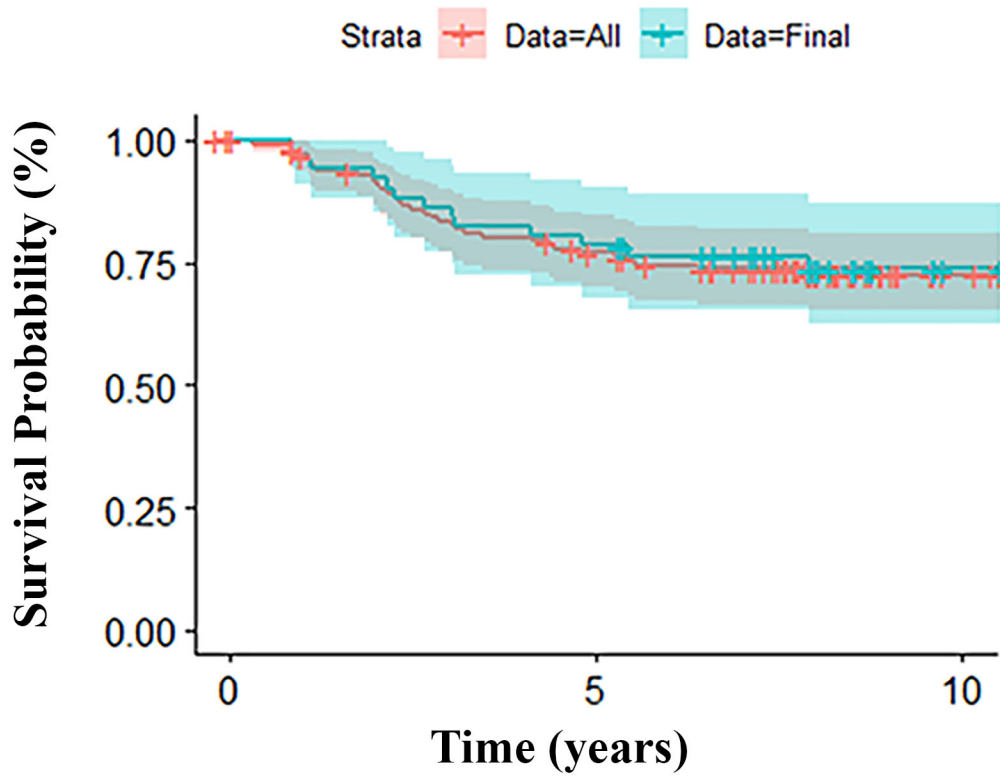

**Supplementary Figure 2**

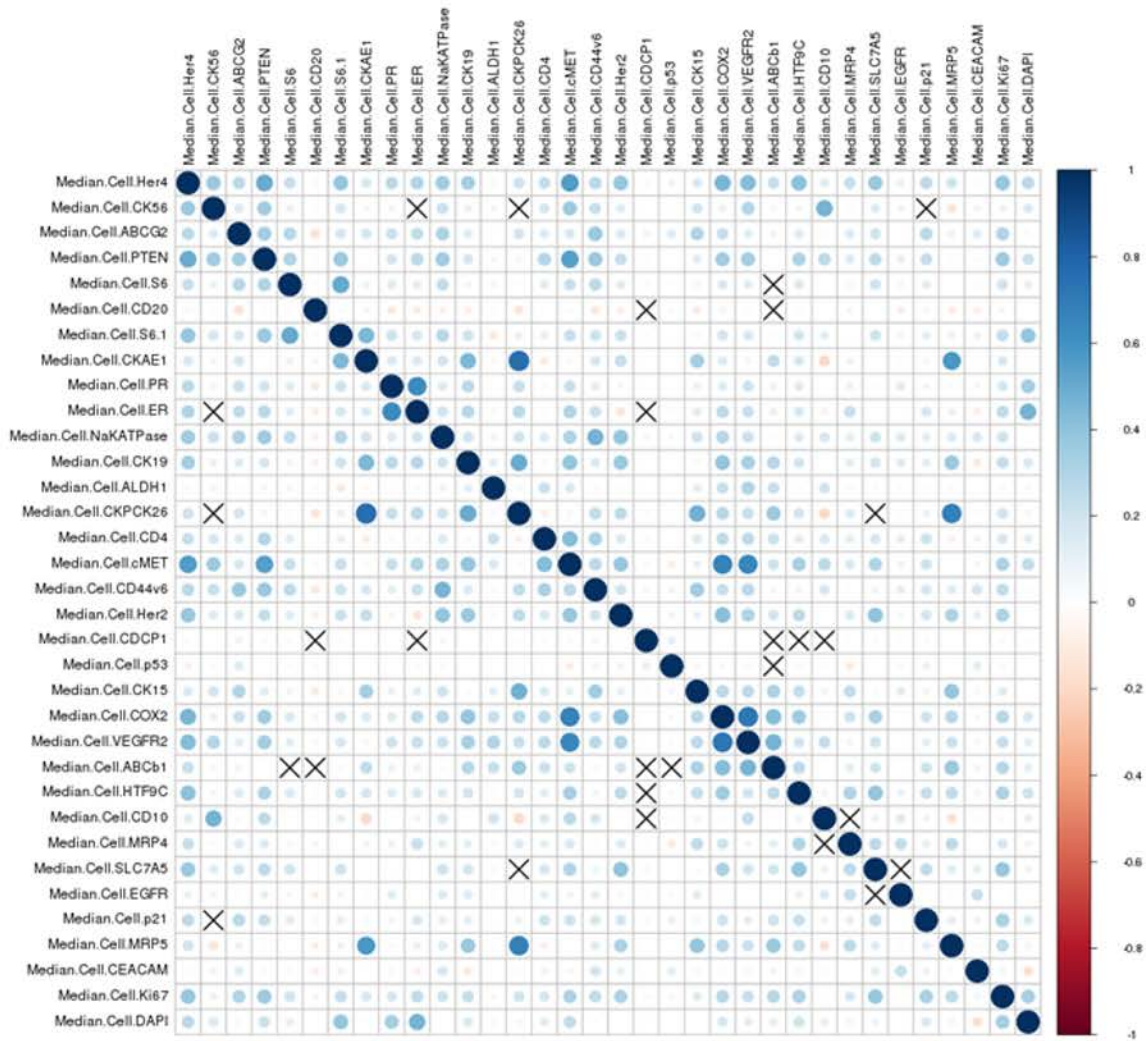

Supplementary Figure 3



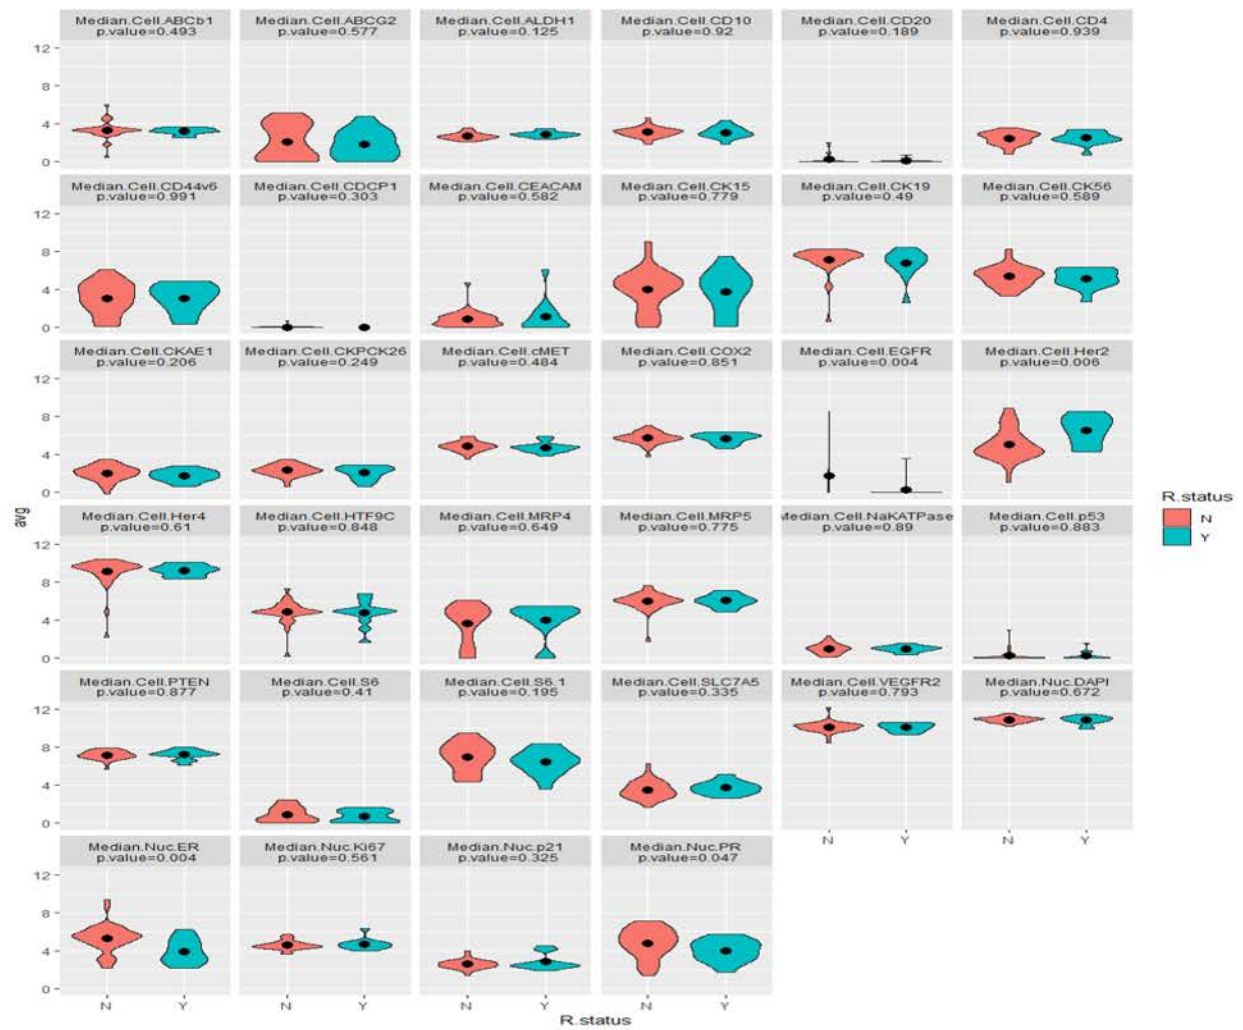

Supplementary Figure 4

## Supplementary Table 1. Demographic and Treatment Summary of DCIS patients

|                                               | Entire Cohort (n=135)    | Study Cohort (n=51)     |
|-----------------------------------------------|--------------------------|-------------------------|
| Age (years)                                   | 32 – 75 (median = 55)    | 34 – 75 (median = 55)   |
| Year of diagnosis                             | 1986 – 2004              | 1986-1999               |
| DCIS grade<br>(High/Moderate/Low/unknown)     | 65/44/19/7               | 26/18/7                 |
| Size of DCIS (cm)                             | 0.4 – 9.5 (median = 1.6) | 0.6 – 9.5 (median = 2)  |
| Estrogen receptor status<br>(pos/neg/unknown) | 20/13/102                | 13/8/30                 |
| Follow up time (years)                        | 0.3– 17 (median = 8)     | 0.8 – 17 (median = 8)   |
| Recurrent Patients (years)                    | 0.8 – 15 (median = 3)    | 0.8 – 8 (median = 2.5)* |
| Non-recurrent Patients (years)                | 0.3 – 17 (median = 9)    | 5 – 17 (median = 9)**   |
| Hormone Therapy                               | 44                       | 22                      |
| Radiation Therapy                             | 22                       | 13                      |
| Hormone and Radiation<br>Therapy              | 14                       | 8                       |
| Breast Cancer event (BCE)                     | 39 (29%)                 | 13 (25%)                |
| In situ                                       | 15 (11%)                 | 5 (10%)                 |
| Ipsilateral invasive                          | 15 (11%)                 | 6 (12%)                 |
| Contralateral invasive                        | 5 (4%)                   | 1 (2%)                  |
| Metastatic                                    | 4 (3%)                   | 1 (2%)                  |

\*Excludes patients with BCE > 10 yrs; \*\*Excludes patients with no BCE < 3 yrs

Supplementary Table 2. Antibodies, Clone, and Conjugate Information

| Antibody-Cy3 | Supplier/Clone             | Antibody-Cy5 | Supplier/Clone       | Antibody-Cy7 | Supplier/Clone      |
|--------------|----------------------------|--------------|----------------------|--------------|---------------------|
| Her4         | LS Bio B5500               | CK 5/6       | Dako M7237           |              |                     |
| ABCG2        | Millipore MAB4146          | PTEN         | Cell Signaling 9188  | S6           | Cell Signaling 2217 |
| CD20         | Epitomics 1632             | S6           | Cell Signaling 2217  | CK AE1       | eBioscience 14-9001 |
| PR           | Dako - M3568               | ER           | Leica PA0151         | NaKATPase    | Epitomics 2047      |
| CK19         | eBioscience 14-9898        | ALDH1        | BD-Bio 611195        | CK PCK26     | Sigma C1801         |
| CD4          | Epitomics 5636             | C-Met        | Cell Signaling 8198P | -            | -                   |
| CD44v6       | eBioscience BMS116         | Her2         | Cell Signaling 4290  | -            | -                   |
| CDPC1        | Cell Signaling 4115        | p53          | Dako M7001           | -            | -                   |
| CK15         | Sigma HPA023910            | Cox-2        | Invitrogen 35-8200   | -            | -                   |
| VEGFR2       | Cell Signaling 2479        | MDR1/ABCB1   | Biorbyt Orb122787    | -            | -                   |
| HTF9C        | Clariant S0729             | CD10         | Leica NCL-L-CD10-270 | -            | -                   |
| MRP4         | Sigma SAB2500011           | SLC7A5       | AGI S0730            | -            | -                   |
| EGFR         | Cell Signaling 5108        | p21          | Cell Signaling 2947  | -            | -                   |
| MRP5         | Abcam Ab24107              | CEACAM5      | AGI S5092M           | -            | -                   |
| Ki67         | Thermo Fisher RB-1510-PABX | -            | -                    | -            | -                   |



**Supplementary Table 3.** Multiplexed Immunofluorescence Staining Sequence for all antibodies.

| step | Staining     |               | Staining     |               | Antibody-<br>Cy7 | Staining<br>Concentration |
|------|--------------|---------------|--------------|---------------|------------------|---------------------------|
|      | Antibody-Cy3 | Concentration | Antibody-Cy5 | Concentration |                  |                           |
| 0    | Background   |               |              |               |                  |                           |
| 1    | Her4         | 4 g/ml        | CK 5/6       | 10ug/ml       |                  |                           |
| 2    | Background   |               |              |               |                  |                           |
| 3    | ABCG2        | 10ug/ml       | PTEN         | 10ug/ml       | S6               | 10ug/ml                   |
| 4    | Background   |               |              |               |                  |                           |
| 5    | CD20         | 2.5ug/ml      | S6           | 5ug/ml        | CK AE1           | 2.5ug/ml                  |
| 6    | Background   |               |              |               |                  |                           |
| 7    | PR           | 10ug/ml       | ER           | 10ug/ml       | NaKATPase        | 5ug/ml                    |
| 8    | Background   |               |              |               |                  |                           |
| 9    | CK19         | 5ug/ml        | ALDH1        | 10ug/ml       | CK PCK26         | 2.5ug/ml                  |
| 10   | Background   |               |              |               |                  |                           |
| 11   | CD4          | 10 µg/mL      | C-Met        | 15ug/ml       |                  |                           |
| 12   | CD44v6       | 5ug/ml        | Her2         | 5ug/ml        |                  |                           |
| 13   | CDCP1        | 20ug/ml       | p53          | 1ug/ml        |                  |                           |
| 14   | CK15         | 5ug/ml        | Cox-2        | 20 µg/mL      |                  |                           |
| 15   | VEGFR2       | 10ug/ml       | MDR1/ABCB1   | 5ug/ml        |                  |                           |
| 16   | Background   |               |              |               |                  |                           |
| 17   | HTF9C        | 5ug/ml        | CD10         | 10ug/ml       |                  |                           |
| 18   | MRP4         | 2.5ug/ml      | SLC7A5       | 5ug/ml        |                  |                           |
| 19   | EGFR         | 1ug/ml        | p21          | 5ug/ml        |                  |                           |
| 20   | MRP5         | 5ug/ml        | CEACAM5      | 2.5ug/ml      |                  |                           |
| 21   | Ki67         | 5ug/ml        | -            |               |                  |                           |

**Supplementary Table 4: Analysis procedure flow down patients to cells.**

|                                       | N slide | N FOV | N cell    | N cores | Details                                                                                                                                                                                                                                                                                                                                                                                                                                                                                                        |
|---------------------------------------|---------|-------|-----------|---------|----------------------------------------------------------------------------------------------------------------------------------------------------------------------------------------------------------------------------------------------------------------------------------------------------------------------------------------------------------------------------------------------------------------------------------------------------------------------------------------------------------------|
| Initial single cell data              | 8       | 748   | 1,972,390 | -       |                                                                                                                                                                                                                                                                                                                                                                                                                                                                                                                |
| Epithelial cells                      | 8       | 748   | 808,200   | -       | Only Epithelial cells were used for this study                                                                                                                                                                                                                                                                                                                                                                                                                                                                 |
| Staining QC                           | 8       | 346   | 479,358   | -       | <ul style="list-style-type: none"> <li>Segmentation quality</li> <li>Staining quality</li> </ul>                                                                                                                                                                                                                                                                                                                                                                                                               |
| Cell filter                           | 8       | 343   | 155,179   | -       | <ul style="list-style-type: none"> <li>Number of nuclei: 1 or 2</li> <li>Areas of cell components (nuc, cyt, memb): 10-1500 pixels</li> </ul>                                                                                                                                                                                                                                                                                                                                                                  |
| Cells for clustering                  | 8       | 338   | 131,568   | 131     | QC score filter: Only included cells with excellent correlation score (=1)                                                                                                                                                                                                                                                                                                                                                                                                                                     |
| <b>[k-means clustering performed]</b> |         |       |           |         |                                                                                                                                                                                                                                                                                                                                                                                                                                                                                                                |
| Outcome Analysis                      | 7       | 168   | 74,913    | 66      | <p>Figure 1 describes filtering process. In total, 65 cores were filtered out for outcome analysis.</p> <ul style="list-style-type: none"> <li>37 cores were excluded due to insufficient clinical information.</li> <li>21 cores were excluded due to insufficient representation of DCIS. <ul style="list-style-type: none"> <li>Non-DCIS FOV: [%DCIS/(%DCIS+%normal)] &lt; 0.5</li> <li>Less than 100 cells/patient</li> </ul> </li> <li>7 cores were excluded due to duration of follow up time</li> </ul> |
